# Supplementary material
Source: MDPI journal article supplement (https://www.mdpi.com/2073-4395/12/11/2871)
Supplement: s1 [file s1]

**Table S1: Geo-Accumulation Index (Igeo) and associated contamination levels of study area**

| Profile No. | Depth (cm) | Igeo |      |      |      |      |       | C. level |     |     |     |     |     |
|-------------|------------|------|------|------|------|------|-------|----------|-----|-----|-----|-----|-----|
|             |            | As   | Co   | Cu   | Ni   | V    | Zn    | As       | Co  | Cu  | Ni  | V   | Zn  |
| 1           | 0-30       | -0.5 | -2.9 | -5.8 | -4.0 | -6.1 | -5.9  | U        | U   | U   | U   | U   | U   |
|             | 30-50      | -2.3 | -3.0 | -6.3 | -4.3 | -6.3 | -9.2  | U        | U   | U   | U   | U   | U   |
|             | 50-80      | -5.2 | -3.6 | -6.3 | -4.6 | -6.2 | -12.5 | U        | U   | U   | U   | U   | U   |
|             | 80-110     | -7.2 | -3.4 | -6.3 | -5.4 | -6.3 | -10.2 | U        | U   | U   | U   | U   | U   |
| 2           | 0-20       | 3.6  | 1.1  | 1.5  | 1.7  | 1.9  | 2.2   | S        | M   | M   | M   | M   | M-S |
|             | 20-50      | 3.5  | -0.4 | 1.3  | 1.1  | 1.7  | 1.3   | S        | U   | M   | M   | M   | M   |
|             | 50-80      | 3.4  | 0.0  | 1.0  | 0.5  | 1.7  | -0.1  | H        | U   | U-M | M   | M   | N   |
| 3           | 0-40       | -0.6 | -3.0 | -5.7 | -4.3 | -5.5 | -3.7  | U        | U   | U   | U   | U   | U   |
|             | 40-70      | -0.5 | -3.3 | -5.6 | -5.0 | -5.6 | -3.0  | U        | U   | U   | U   | U   | U   |
|             | 70-100     | -5.1 | -3.5 | -5.9 | -5.0 | -5.7 | -9.2  | U        | U   | U   | U   | U   | U   |
|             | 100-130    | -5.6 | -3.6 | -6.0 | -9.7 | -5.7 | -10.2 | U        | U   | U   | U   | U   | U   |
| 4           | 0-30       | 5.3  | 0.7  | 1.2  | 1.6  | 1.0  | 2.4   | E        | U-M | U-M | M   | M   | M-S |
|             | 30-50      | 4.0  | 0.1  | 1.2  | 1.3  | 0.9  | 0.8   | S-E      | U-M | M   | M   | U-M | U-M |
|             | 50-80      | 2.9  | 0.0  | 1.0  | 1.2  | 0.8  | -4.1  | M-S      | U   | M   | U-M | U-M | U   |
|             | 80-110     | 2.9  | -0.1 | 1.0  | 0.6  | 0.8  | -4.8  | M-S      | U   | M   | U-M | U-M | U   |
|             | 110-150    | 2.3  | -1.0 | 0.7  | 0.5  | 0.7  | -5.1  | M-S      | U   | U-M | U-M | U-M | U   |
| 5           | 0-40       | -1.6 | -2.8 | -4.4 | -3.8 | -5.2 | -4.5  | U        | U   | U   | U   | U   | U   |
|             | 40-70      | -5.4 | -3.2 | -5.1 | -5.4 | -5.8 | -5.5  | U        | U   | U   | U   | U   | U   |
|             | 70-110     | -6.2 | -4.1 | -6.3 | -5.6 | -5.8 | -10.0 | U        | U   | U   | U   | U   | U   |
| 6           | 0-35       | 5.0  | 0.9  | 1.6  | 1.8  | 1.3  | 1.6   | E        | U-M | M   | M   | M   | M   |
|             | 35-65      | 4.6  | 0.2  | 1.3  | 1.7  | 1.2  | 1.5   | S-E      | U-M | M   | M   | M   | M   |
|             | 65-80      | 4.0  | -0.5 | 1.2  | 1.7  | 1.1  | 0.5   | S-E      | U-M | M   | M   | M   | U-M |
|             | 80-150     | 3.0  | -0.7 | 1.2  | 1.4  | 1.1  | -0.6  | S        | U   | M   | M   | M   | U   |
| 7           | 0-40       | 3.2  | 1.0  | 1.3  | 2.3  | 1.7  | 1.8   | S        | M   | M   | M-S | M   | M   |
|             | 40-70      | 2.9  | 0.5  | 1.2  | 2.0  | 1.7  | 1.5   | M-S      | U-M | M   | M   | M   | M   |
|             | 70-90      | 2.7  | 0.4  | 1.1  | 1.8  | 1.6  | 1.0   | M-S      | U-M | M   | M   | M   | U-M |
|             | 90-150     | 1.3  | -0.4 | 0.9  | 1.3  | 1.2  | -0.4  | M        | U   | U   | U   | M   | U   |

| Profile No. | Depth (cm) | Igeo |      |      |      |      |       | C. level |     |     |     |     |     |
|-------------|------------|------|------|------|------|------|-------|----------|-----|-----|-----|-----|-----|
|             |            | As   | Co   | Cu   | Ni   | V    | Zn    | As       | Co  | Cu  | Ni  | V   | Zn  |
| 8           | 0-20       | 3.4  | 0.7  | 1.5  | 2.0  | 2.3  | 2.3   | S        | U-M | M   | M   | M-S | M-S |
|             | 20-50      | 1.3  | 0.3  | 1.3  | 1.9  | 2.1  | 1.4   | M        | U-M | M   | M   | M-S | M   |
|             | 50-80      | -1.7 | 0.0  | 1.3  | 1.7  | 2.1  | 1.2   | U        | U   | M   | M   | M-S | M   |
|             | 80-110     | -1.9 | -0.8 | 0.9  | 1.5  | 1.7  | -1.9  | U        | U   | U-M | M   | M   | U   |
| 9           | 0-40       | 3.7  | 1.1  | 1.9  | 2.4  | 2.1  | 1.5   | S        | M   | M   | M-S | M-S | M   |
|             | 40-75      | 2.7  | 0.9  | 1.4  | 1.8  | 1.9  | 1.0   | M-S      | U-M | M   | M   | M   | U-M |
|             | 75-100     | 2.3  | 0.9  | 1.0  | 0.8  | 1.4  | 0.9   | M-S      | U-M | U-M | U-M | M   | U-M |
|             | 100-150    | 2.2  | 0.7  | 0.4  | 0.7  | 1.3  | 0.4   | M-S      | U-M | U-M | U-M | M   | U-M |
| 10          | 0-30       | 3.3  | 0.4  | 1.8  | 2.0  | 1.6  | 2.3   | S        | U-M | M   | M   | M   | M-S |
|             | 30-65      | 3.1  | 0.2  | 1.5  | 1.7  | 0.9  | 2.3   | S        | U-M | M   | M   | U-M | M-S |
|             | 65-100     | 3.2  | 0.0  | 1.2  | 1.5  | 0.8  | -2.5  | S        | U   | M   | M   | U-M | U   |
|             | 100-150    | 2.7  | -0.2 | 1.0  | 1.2  | 0.7  | -4.2  | M-S      | U   | U-M | M   | U-M | U   |
| 11          | 0-30       | 3.5  | 1.8  | 1.4  | 2.8  | 2.2  | 2.0   | S        | M   | M   | M   | M-S | M   |
|             | 30-60      | 2.1  | 1.2  | 1.3  | 2.5  | 1.9  | 1.1   | M-S      | M   | M   | M-S | M   | M   |
|             | 60-80      | 1.5  | 0.9  | 1.3  | 2.0  | 1.9  | 1.0   | M        | U-M | M   | M   | M   | U-M |
|             | 80-110     | 0.3  | 0.8  | 1.3  | 1.0  | 1.7  | -4.0  | U-M      | U-M | M   | U-M | M   | N   |
| 12          | 0-30       | 3.6  | 0.8  | 1.5  | 2.5  | 2.0  | 1.9   | S        | U-M | M   | M-S | M   | M   |
|             | 30-60      | 3.2  | 0.6  | 1.4  | 2.4  | 2.0  | 1.9   | S        | U-M | M   | M-S | M   | M   |
|             | 60-90      | 1.6  | 0.6  | 1.3  | 2.1  | 2.0  | -3.3  | M        | U-M | M   | M-S | M   | U   |
|             | 90-120     | -0.3 | 0.6  | 1.1  | 1.4  | 1.9  | -4.1  | U        | L   | M   | M   | M   | U   |
|             | 120-150    | -2.5 | 0.0  | 0.9  | 1.3  | 1.8  | -4.3  | U        | U   | L   | U-M | M   | N   |
| 13          | 0-40       | 4.7  | 0.3  | 1.7  | 2.6  | 2.1  | 2.3   | S-E      | U-M | M   | M-S | M-S | M-S |
|             | 40-60      | 4.3  | 0.1  | 1.6  | 2.5  | 2.1  | 2.2   | S-E      | U-M | M   | M-S | M-S | M-S |
|             | 60-80      | 3.7  | -0.8 | 1.3  | 2.1  | 1.8  | 2.2   | S        | U   | M   | M-S | M   | M-S |
|             | 80-110     | 1.6  | -1.5 | 1.3  | 1.7  | 1.8  | 2.0   | M        | U   | M   | M   | M   | M   |
|             | 110-150    | -1.9 | -3.8 | 1.1  | 1.2  | 1.6  | 2.0   | U        | U   | M   | M   | M   | M   |
| 14          | 0-10       | -2.5 | -2.3 | -6.0 | -4.3 | -5.5 | -2.9  | U        | U   | U   | U   | U   | U   |
|             | 10-30      | -5.1 | -2.5 | -6.1 | -4.3 | -5.7 | -3.6  | U        | U   | U   | U   | U   | U   |
|             | 30-60      | -5.4 | -2.8 | -6.2 | -5.0 | -6.2 | -10.7 | U        | U   | U   | U   | U   | U   |

|           | Depth          | Igeo |      |      |      |      |       | C. level |     |     |    |     |    |
|-----------|----------------|------|------|------|------|------|-------|----------|-----|-----|----|-----|----|
|           |                | As   | Co   | Cu   | Ni   | V    | Zn    | As       | Co  | Cu  | Ni | V   | Zn |
|           | <b>60-80</b>   | -8.2 | -2.7 | -6.4 | -4.6 | -6.3 | -10.5 | U        | U   | U   | U  | U   | U  |
| <b>15</b> | <b>0-40</b>    | 4.5  | -2.9 | 1.4  | 1.9  | 1.2  | 2.0   | S-E      | U   | M   | M  | M   | M  |
|           | <b>40-70</b>   | 4.3  | -0.1 | 1.2  | 1.8  | 1.2  | 2.0   | S-E      | U   | M   | M  | M   | M  |
|           | <b>70-100</b>  | 3.7  | -0.3 | 1.1  | 1.1  | 1.0  | 1.8   | S        | U   | M   | M  | U-M | M  |
|           | <b>100-150</b> | 3.2  | 0.9  | 1.0  | 0.2  | 1.0  | -0.8  | S        | U-M | U-M | M  | U-M | N  |

Notes: U= Uncontaminated, U-M= Uncontaminated to moderately contaminated, M= Moderately contaminated, M-S= Moderately contaminated to Strongly, S= Strongly, S-E= Strongly to Extremely, E= Extremely.

**Table S2: Contamination factor (CF) and associated contamination levels of study area**

| Profile No. | Depth (cm)     | CF    |      |      |      |      |      | C. level |    |    |    |   |    |
|-------------|----------------|-------|------|------|------|------|------|----------|----|----|----|---|----|
|             |                | As    | Co   | Cu   | Ni   | V    | Zn   | As       | Co | Cu | Ni | V | Zn |
| <b>1</b>    | <b>0-30</b>    | 1.09  | 0.20 | 0.03 | 0.10 | 0.02 | 0.03 | M        | L  | L  | L  | L | L  |
|             | <b>30-50</b>   | 0.32  | 0.19 | 0.02 | 0.08 | 0.02 | 0.00 | L        | L  | L  | L  | L | L  |
|             | <b>50-80</b>   | 0.04  | 0.12 | 0.02 | 0.06 | 0.02 | 0.00 | L        | L  | L  | L  | L | L  |
|             | <b>80-110</b>  | 0.01  | 0.15 | 0.02 | 0.03 | 0.02 | 0.00 | L        | L  | L  | L  | L | L  |
| <b>2</b>    | <b>0-20</b>    | 18.38 | 3.15 | 4.20 | 4.80 | 5.64 | 6.97 | VH       | C  | C  | C  | C | VH |
|             | <b>20-50</b>   | 16.65 | 1.18 | 3.69 | 3.30 | 5.01 | 3.74 | VH       | M  | C  | C  | C | C  |
|             | <b>50-80</b>   | 16.01 | 1.54 | 3.04 | 2.16 | 4.86 | 1.37 | VH       | M  | C  | M  | C | M  |
| <b>3</b>    | <b>0-40</b>    | 1.02  | 0.19 | 0.03 | 0.08 | 0.03 | 0.12 | M        | L  | L  | L  | L | L  |
|             | <b>40-70</b>   | 1.09  | 0.15 | 0.03 | 0.05 | 0.03 | 0.19 | M        | L  | L  | L  | L | L  |
|             | <b>70-100</b>  | 0.05  | 0.13 | 0.03 | 0.05 | 0.03 | 0.00 | L        | L  | L  | L  | L | L  |
|             | <b>100-130</b> | 0.03  | 0.13 | 0.02 | 0.00 | 0.03 | 0.00 | L        | L  | L  | L  | L | L  |
| <b>4</b>    | <b>0-30</b>    | 60.60 | 2.40 | 3.52 | 4.47 | 3.09 | 7.68 | VH       | M  | C  | C  | C | VH |
|             | <b>30-50</b>   | 23.63 | 1.60 | 3.40 | 3.72 | 2.78 | 2.55 | VH       | M  | C  | C  | M | M  |
|             | <b>50-80</b>   | 11.50 | 1.51 | 2.94 | 3.36 | 2.65 | 0.09 | VH       | M  | M  | C  | M | L  |
|             | <b>80-110</b>  | 11.10 | 1.38 | 2.92 | 2.31 | 2.64 | 0.05 | VH       | M  | M  | M  | M | L  |
|             | <b>110-150</b> | 7.28  | 0.76 | 2.49 | 2.13 | 2.51 | 0.04 | VH       | L  | M  | M  | M | L  |
| <b>5</b>    | <b>0-40</b>    | 0.51  | 0.22 | 0.07 | 0.11 | 0.04 | 0.07 | L        | L  | L  | L  | L | L  |
|             | <b>40-70</b>   | 0.04  | 0.16 | 0.04 | 0.04 | 0.03 | 0.03 | L        | L  | L  | L  | L | L  |
|             | <b>70-110</b>  | 0.02  | 0.09 | 0.02 | 0.03 | 0.03 | 0.00 | L        | L  | L  | L  | L | L  |
| <b>6</b>    | <b>0-35</b>    | 47.26 | 2.76 | 4.45 | 5.37 | 3.72 | 4.40 | VH       | M  | C  | C  | C | C  |
|             | <b>35-65</b>   | 35.87 | 1.76 | 3.58 | 4.86 | 3.41 | 4.26 | VH       | M  | C  | C  | C | C  |
|             | <b>65-80</b>   | 23.70 | 1.09 | 3.49 | 4.71 | 3.27 | 2.12 | VH       | M  | C  | C  | C | M  |
|             | <b>80-150</b>  | 12.15 | 0.94 | 3.42 | 3.96 | 3.13 | 0.98 | VH       | L  | C  | C  | C | L  |
| <b>7</b>    | <b>0-40</b>    | 13.32 | 3.00 | 3.74 | 7.14 | 4.83 | 5.26 | VH       | C  | C  | VH | C | C  |
|             | <b>40-70</b>   | 10.86 | 2.14 | 3.53 | 5.88 | 4.74 | 4.26 | VH       | M  | C  | C  | C | C  |
|             | <b>70-90</b>   | 9.69  | 1.91 | 3.29 | 5.07 | 4.45 | 2.98 | VH       | M  | C  | C  | C | M  |
|             | <b>90-150</b>  | 3.79  | 1.18 | 2.83 | 3.78 | 3.43 | 1.12 | C        | M  | M  | C  | C | M  |

| Profile No. | Depth (cm) | CF    |      |      |       |      |      | C. level |    |    |    |    |    |
|-------------|------------|-------|------|------|-------|------|------|----------|----|----|----|----|----|
|             |            | As    | Co   | Cu   | Ni    | V    | Zn   | As       | Co | Cu | Ni | V  | Zn |
| 8           | 0-20       | 15.37 | 2.44 | 4.22 | 6.12  | 7.12 | 7.39 | VH       | M  | C  | VH | VH | VH |
|             | 20-50      | 3.79  | 1.87 | 3.65 | 5.64  | 6.20 | 3.97 | C        | M  | C  | C  | VH | C  |
|             | 50-80      | 0.47  | 1.49 | 3.58 | 4.92  | 6.30 | 3.55 | L        | M  | C  | C  | VH | C  |
|             | 80-110     | 0.41  | 0.89 | 2.88 | 4.29  | 4.78 | 0.41 | L        | L  | M  | C  | C  | L  |
| 9           | 0-40       | 19.87 | 3.15 | 5.65 | 7.62  | 6.48 | 4.26 | VH       | C  | C  | VH | VH | C  |
|             | 40-75      | 10.01 | 2.80 | 4.03 | 5.07  | 5.46 | 2.98 | VH       | M  | C  | C  | C  | M  |
|             | 75-100     | 7.53  | 2.80 | 3.00 | 2.58  | 3.99 | 2.83 | VH       | M  | C  | M  | C  | M  |
|             | 100-150    | 6.88  | 2.51 | 1.99 | 2.37  | 3.65 | 1.98 | VH       | M  | M  | M  | C  | M  |
| 10          | 0-30       | 14.72 | 2.02 | 5.11 | 5.85  | 4.58 | 7.54 | VH       | M  | C  | C  | C  | VH |
|             | 30-65      | 12.79 | 1.67 | 4.34 | 4.83  | 2.84 | 7.39 | VH       | M  | C  | C  | M  | VH |
|             | 65-100     | 13.44 | 1.51 | 3.47 | 4.23  | 2.64 | 0.27 | VH       | M  | M  | C  | M  | L  |
|             | 100-150    | 10.03 | 1.27 | 3.04 | 3.51  | 2.36 | 0.08 | VH       | M  | M  | C  | M  | L  |
| 11          | 0-30       | 16.65 | 5.17 | 3.90 | 10.51 | 6.74 | 6.18 | VH       | C  | C  | VH | VH | VH |
|             | 30-60      | 6.27  | 3.47 | 3.80 | 8.22  | 5.77 | 3.26 | VH       | C  | C  | VH | C  | C  |
|             | 60-80      | 4.33  | 2.74 | 3.72 | 5.85  | 5.60 | 2.98 | C        | M  | C  | C  | C  | M  |
|             | 80-110     | 1.86  | 2.62 | 3.71 | 3.09  | 4.84 | 0.09 | M        | M  | C  | C  | C  | L  |
| 12          | 0-30       | 18.58 | 2.69 | 4.13 | 8.38  | 5.80 | 5.76 | VH       | M  | C  | VH | C  | C  |
|             | 30-60      | 14.08 | 2.29 | 4.06 | 7.71  | 5.93 | 5.61 | VH       | M  | C  | VH | C  | C  |
|             | 60-90      | 4.43  | 2.33 | 3.57 | 6.45  | 5.81 | 0.15 | C        | M  | C  | VH | C  | L  |
|             | 90-120     | 1.21  | 2.22 | 3.13 | 3.99  | 5.39 | 0.09 | M        | M  | C  | C  | C  | L  |
|             | 120-150    | 0.26  | 1.53 | 2.83 | 3.72  | 5.16 | 0.08 | L        | M  | M  | C  | C  | L  |
| 13          | 0-40       | 38.53 | 1.87 | 4.90 | 9.31  | 6.43 | 7.25 | VH       | M  | C  | VH | VH | VH |
|             | 40-60      | 29.52 | 1.58 | 4.44 | 8.38  | 6.38 | 6.97 | VH       | M  | C  | VH | VH | VH |
|             | 60-80      | 19.87 | 0.85 | 3.76 | 6.39  | 5.06 | 6.75 | VH       | L  | C  | VH | C  | VH |
|             | 80-110     | 4.43  | 0.54 | 3.71 | 4.83  | 5.19 | 6.00 | C        | L  | C  | C  | C  | VH |
|             | 110-150    | 0.41  | 0.11 | 3.30 | 3.45  | 4.58 | 5.83 | L        | L  | C  | C  | C  | C  |
| 14          | 0-10       | 0.26  | 0.30 | 0.02 | 0.08  | 0.03 | 0.20 | L        | L  | L  | L  | L  | L  |
|             | 10-30      | 0.05  | 0.27 | 0.02 | 0.08  | 0.03 | 0.13 | L        | L  | L  | L  | L  | L  |
|             | 30-60      | 0.04  | 0.21 | 0.02 | 0.05  | 0.02 | 0.00 | L        | L  | L  | L  | L  | L  |

|           | Depth          | CF    |      |      |      |      |      | C. level |    |    |    |   |    |
|-----------|----------------|-------|------|------|------|------|------|----------|----|----|----|---|----|
|           |                | As    | Co   | Cu   | Ni   | V    | Zn   | As       | Co | Cu | Ni | V | Zn |
|           | <b>60-80</b>   | 0.01  | 0.23 | 0.02 | 0.06 | 0.02 | 0.00 | L        | L  | L  | L  | L | L  |
| <b>15</b> | <b>0-40</b>    | 33.38 | 0.20 | 3.83 | 5.64 | 3.54 | 5.97 | VH       | L  | C  | C  | C | C  |
|           | <b>40-70</b>   | 28.88 | 1.40 | 3.49 | 5.37 | 3.34 | 5.83 | VH       | M  | C  | C  | C | C  |
|           | <b>70-100</b>  | 19.68 | 1.23 | 3.15 | 3.30 | 3.09 | 5.26 | VH       | M  | C  | C  | C | C  |
|           | <b>100-150</b> | 13.44 | 2.71 | 2.93 | 1.74 | 3.02 | 0.84 | VH       | M  | M  | M  | C | L  |

Notes: L= Low contamination, M= Moderate contamination, C= Considerable contamination, VH= Very High contamination.
